# Supplementary material
Source: Frontiers journal article supplement (https://www.frontiersin.org/articles/455798)
Supplement: Data_Sheet_1.PDF [file Data_Sheet_1.PDF]

## Supplementary Figures

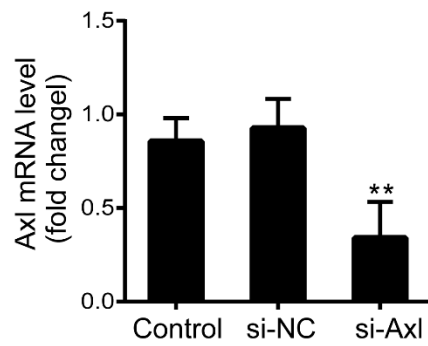

**Supplementary Figure 1. Axl siRNA transfection efficiency.** MAECs were transfected with Axl siRNA (siAxl) or nonspecific control siRNA (siNC) for 36 h, real-time PCR was used to examine the mRNA expression of Axl after MAECs transfected with siAxl. (n=3, mean  $\pm$  SD, \*\*P<0.01 versus the siNC group.)
